# Supplementary material
Source: Springer Nature journal article supplement (https://www.springermedizin.de/resource/supplementary/12887_2005_91_MOESM4_ESM.pdf/9477246)

0.05 0.14 0.37 1.00 2.72 7.39 20.09

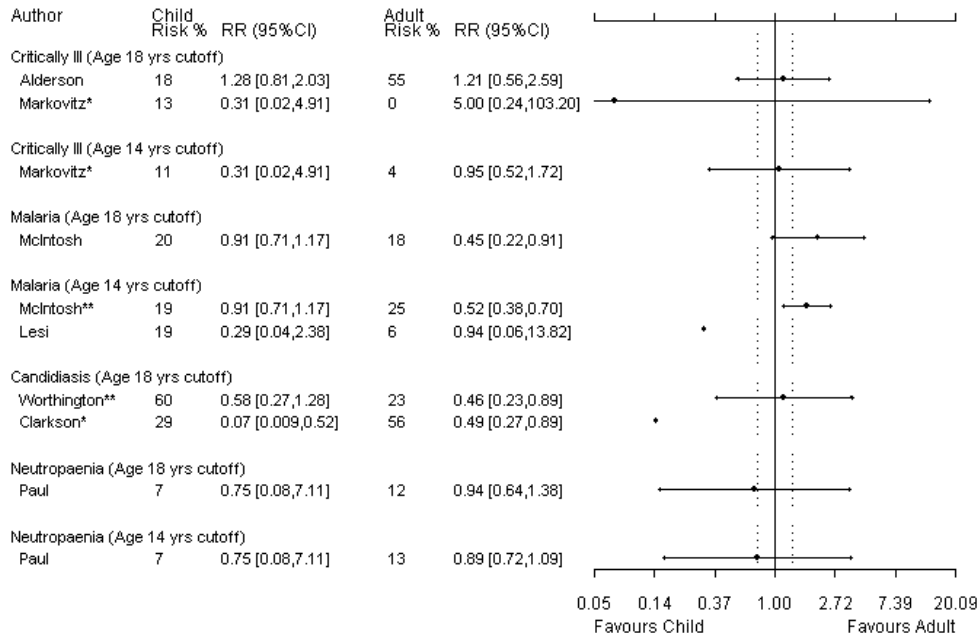

Supplement: MOESM4 [file 9477246]
